# Supplementary material for: Use of a MCL-1 inhibitor alone to de-bulk melanoma and in combination to kill melanoma initiating cells
Source: PubMed Central journal article supplement (PMC5564524; doi:10.18632/oncotarget.8695), 2016-04-12
Supplement: oncotarget-08-46801-s001.pdf [file oncotarget-08-46801-s001.pdf]

SUPPLEMENTARY FIGURES AND TABLES

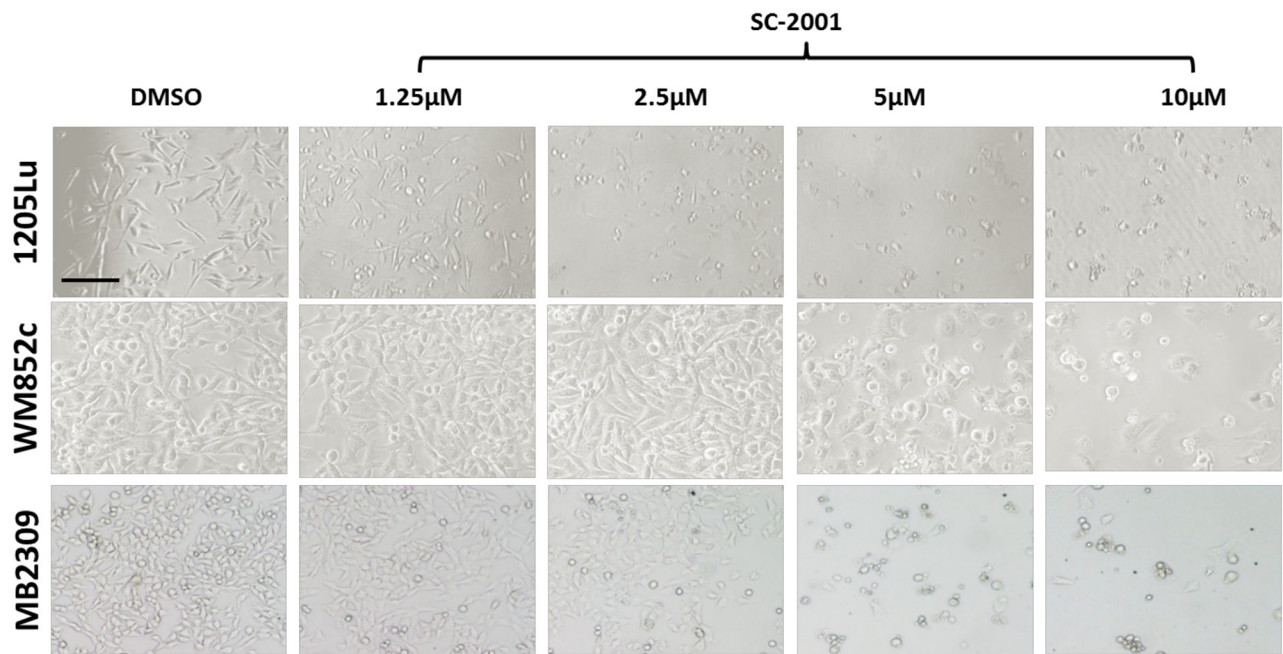

Supplementary Figure S1: Bright-field images of melanoma cells treated with indicated dose of SC-2001 for 48 hrs. Scale bar = 100µm.

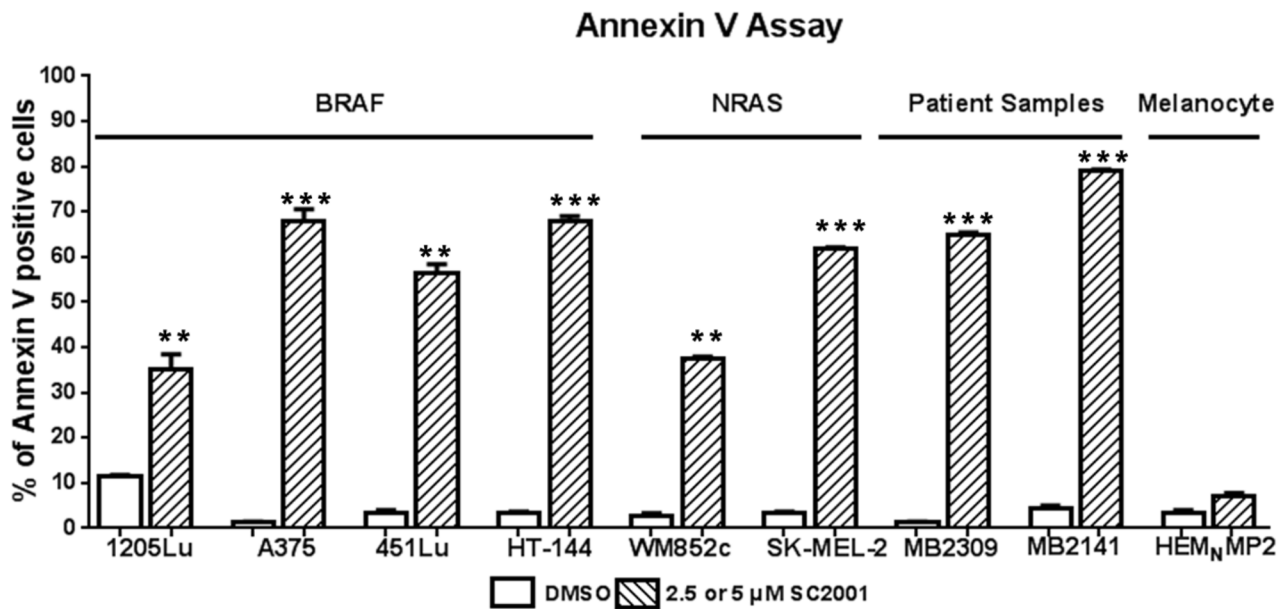

Supplementary Figure S2: The Annexin V assay shows massive apoptosis in melanoma cells induced by 48 hrs treatment of SC-2001. SC-2001 treatment significantly induced apoptosis compared to DMSO, (\*\*P < 0.01; \*\*\*P < 0.001) in all melanoma cells tested (irrespective of the mutation status).

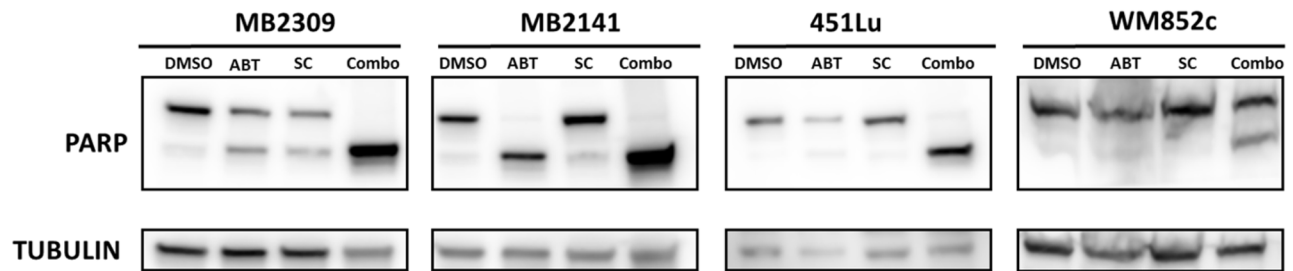

Supplementary Figure S3: Immunoblot of full length and cleaved PARP for sphere cell lysates treated with DMSO, ABT-737 (3.3µM), SC-2001 (2.5µM) or Combination for 48 hrs.

Supplementary Table S1: IC50 values for SC-2001

|        | IC50 (µM) |
|--------|-----------|
| A375   | 3.52      |
| 1205Lu | 4.61      |
| HT144  | 2.14      |
| WM852c | 4.62      |
| MB2309 | 4.12      |

Supplementary Table S2: Significance chart for Primary Sphere Assay

|          | DMSO vs. Combo | ABT-737 vs. Combo | SC-2001 vs. Combo |
|----------|----------------|-------------------|-------------------|
| A375     | ***            | ***               | **                |
| 451Lu    | **             | **                | *                 |
| SKMEL-28 | ***            | ***               | *                 |
| HT144    | ***            | ***               | ***               |
| 1205Lu   | ***            | ***               | ***               |
| WM852c   | ***            | ***               | **                |
| MB2141   | ***            | **                | **                |
| MB2309   | **             | **                | ***               |
| MB1823   | ns             | ns                | ns                |
| MB1374   | ***            | *                 | **                |
| MB1860   | ***            | ***               | **                |
| MB1468   | ***            | ***               | **                |
| MB1920   | ***            | ***               | ***               |
| PS4      | ***            | ***               | ***               |

\*\*\*indicates  $P < 0.001$  or less; \*\*indicates  $P < 0.01$ ; \*indicates  $P < 0.05$

Supplementary Table S3: Significance chart for ALDH assay

|          | DMSO vs. Combo | ABT-737 vs. Combo |
|----------|----------------|-------------------|
| A375     | ***            | *                 |
| 451Lu    | **             | ns                |
| SKMEL-28 | ***            | **                |
| HT144    | *              | *                 |
| 1205Lu   | **             | *                 |
| WM852c   | *              | **                |
| MB2141   | ***            | ***               |
| MB2309   | ***            | ***               |

\*\*\*indicates P<0.001 or less; \*\*indicates P<0.01; \*indicates P<0.05

Unfortunately, we did not have enough material to do additional replicates for last four samples of Figure 4C, so we could not statistically analyze the data

Supplementary Table S4: Significance chart for Secondary Sphere Assay

|          | DMSO vs. Combo | ABT-737 vs. Combo | SC2001 vs. Combo |
|----------|----------------|-------------------|------------------|
| A375     | ***            | **                | *                |
| 451Lu    | ***            | ***               | ***              |
| SKMEL-28 | ***            | ***               | *                |
| HT144    | *              | *                 | *                |
| 1205Lu   | ***            | ***               | ***              |
| WM852c   | ***            | ***               | ***              |
| MB2141   | ***            | ***               | ***              |
| MB2309   | ***            | ***               | ***              |
| MB1374   | ns             | ns                | ns               |

\*\*\*indicates P<0.001 or less; \*\*indicates P<0.01; \*indicates P<0.05
